# Supplementary material
Source: publisher figshare collection journal article supplement (https://acs.figshare.com/ndownloader/files/20087351)
Supplement: Supplementary file 1 [file 20087351]

		% AR protein degradation in LNCaP Cells (µM)			DC50 (nM)
Compound	SMILES	0.01	0.1	1	LNCaP	VCaP	22Rv1
1	ClC1=CC(O[C@H]2C(C)(C)[C@H](NC(C3=CC=C(C#CC4CCN(C5CCN(C(C[C@H](NC([C@@H]6C[C@@H](O)CN6C([C@H](C(C)C)C7=CC(C)=NO7)=O)=O)C8=CC=C(C9=C(C)N=CS9)C=C8)=O)CC5)CC4)C=C3)=O)C2(C)C)=CC=C1C#N	76	>95	>99
2	ClC1=CC(O[C@H]2C(C)(C)[C@H](NC(C3=CC=C(C#CC4CCN(C5CCN(C(C[C@H](NC([C@@H]6C[C@@H](O)CN6C([C@@H](C7=CC(C)=NO7)C(C)C)=O)=O)C8=CC=C(C#C)C=C8)=O)CC5)CC4)C=C3)=O)C2(C)C)=CC=C1C#N	68	>95	>99
3	ClC1=CC(O[C@H]2C(C)(C)[C@H](NC(C3=CC=C(C#CC4CCN(C5CCN(C(C[C@H](NC([C@@H]6C[C@@H](O)CN6C([C@@H](C7=CC(C)=NO7)C(C)C)=O)=O)C8=CC=C(C#N)C=C8)=O)CC5)CC4)C=C3)=O)C2(C)C)=CC=C1C#N	81	>95	>99
4	ClC1=CC(O[C@H]2C(C)(C)[C@H](NC(C3=CC=C(C#CC4CCN(C5CCN(C(C[C@H](NC([C@@H]6C[C@@H](O)CN6C([C@@H](C7=CC(C)=NO7)C(C)C)=O)=O)C8=CC=C(Br)C=C8)=O)CC5)CC4)C=C3)=O)C2(C)C)=CC=C1C#N	45	76	>99
5	ClC1=CC(O[C@H]2C(C)(C)[C@H](NC(C3=CC=C(C#CC4CCN(C5CCN(C(C[C@H](NC([C@@H]6C[C@@H](O)CN6C([C@@H](C7=CC(C)=NO7)C(C)C)=O)=O)C8=CC=C(Cl)C=C8)=O)CC5)CC4)C=C3)=O)C2(C)C)=CC=C1C#N	85	>95	>99
6	ClC1=CC(O[C@H]2C(C)(C)[C@H](NC(C3=CC=C(C#CC4CCN(C5CCN(C(C[C@H](NC([C@@H]6C[C@@H](O)CN6C([C@@H](C7=CC(C)=NO7)C(C)C)=O)=O)C8=CC=C(F)C=C8)=O)CC5)CC4)C=C3)=O)C2(C)C)=CC=C1C#N	92	>95	>99
7	ClC1=CC(O[C@H]2C(C)(C)[C@H](NC(C3=CC=C(C#CC4CCN(C5CCN(C(C[C@H](NC([C@@H]6C[C@@H](O)CN6C([C@H](C(C)C)C7=CC(C)=NO7)=O)=O)C8=CC=CC=C8)=O)CC5)CC4)C=C3)=O)C2(C)C)=CC=C1C#N	62	72	>99
8	O=C([C@@H]1C[C@@H](O)CN1C([C@H](C(C)C)NC(C)=O)=O)N[C@@H](CC(N(CC2)CCC2N(CC3)CCC3C#CC(C=C4)=CC=C4C(N[C@H](C5(C)C)C(C)(C)[C@@H]5OC6=CC=C(C#N)C(Cl)=C6)=O)=O)C7=CC=CC=C7	8	11	17
9	ClC1=CC(O[C@H]2C(C)(C)[C@H](NC(C3=CC=C(C#CC4CN(C5CCN(C(C[C@H](NC([C@@H]6C[C@@H](O)CN6C([C@@H](C7=CC(C)=NO7)C(C)C)=O)=O)C8=CC=CC=C8)=O)CC5)C4)C=C3)=O)C2(C)C)=CC=C1C#N	6	68	86
10	ClC1=CC(O[C@H]2C(C)(C)[C@H](NC(C3=CC=C(C#CC4CCN(C5CN(C(C[C@H](NC([C@@H]6C[C@@H](O)CN6C([C@@H](C7=CC(C)=NO7)C(C)C)=O)=O)C8=CC=CC=C8)=O)C5)CC4)C=C3)=O)C2(C)C)=CC=C1C#N	21	67	68
11	ClC1=CC(O[C@H]2C(C)(C)[C@H](NC(C3=CC=C(C#CC4CCN(C(C[C@H](NC([C@@H]5C[C@@H](O)CN5C([C@H](C(C)C)C6=CC(C)=NO6)=O)=O)C7=CC=CC=C7)=O)CC4)C=C3)=O)C2(C)C)=CC=C1C#N	90	>95	>99	0.5352	0.9686	0.1532
12	ClC1=CC(O[C@H]2C(C)(C)[C@H](NC(C3=CC=C(N4CC(C5CCN(C(C[C@H](NC([C@@H]6C[C@@H](O)CN6C([C@H](C(C)C)C7=CC(C)=NO7)=O)=O)C8=CC=CC=C8)=O)CC5)C4)C=C3)=O)C2(C)C)=CC=C1C#N	48	>95	>99
13	ClC1=CC(O[C@H]2C(C)(C)[C@H](NC(C3=CC=C(C4CN(C5CCN(C(C[C@H](NC([C@@H]6C[C@@H](O)CN6C([C@H](C(C)C)C7=CC(C)=NO7)=O)=O)C8=CC=CC=C8)=O)CC5)C4)C=C3)=O)C2(C)C)=CC=C1C#N	40	>95	>99
14	ClC1=CC(O[C@H]2C(C)(C)[C@H](NC(C3=CC=C(C4CCN(C(C[C@H](NC([C@@H]5C[C@@H](O)CN5C([C@@H](C6=CC(C)=NO6)C(C)C)=O)=O)C7=CC=CC=C7)=O)CC4)C=C3)=O)C2(C)C)=CC=C1C#N	38	>95	>99
15	ClC1=CC(O[C@H]2C(C)(C)[C@H](NC(C3=CC=C(N4CCN(C(C[C@H](NC([C@@H]5C[C@@H](O)CN5C([C@@H](C6=CC(C)=NO6)C(C)C)=O)=O)C7=CC=CC=C7)=O)CC4)C=C3)=O)C2(C)C)=CC=C1C#N	<5	>95	>99
16	ClC1=CC(O[C@H]2C(C)(C)[C@H](NC(C3=CC=C(C#CC4CCN(C(C[C@H](NC([C@@H]5C[C@@H](O)CN5C([C@@H](C6=CC(C)=NO6)C(C)C)=O)=O)C7=CC=C(C8=C(C)N=CS8)C=C7)=O)CC4)C=C3)=O)C2(C)C)=CC=C1C#N	56	>95	>99
17	ClC1=CC(O[C@H]2C(C)(C)[C@H](NC(C3=CC=C(C#CC4CCN(C(C[C@H](NC([C@@H]5C[C@@H](O)CN5C([C@H](C(C)C)C6=CC(C)=NO6)=O)=O)C7=CC=C(F)C=C7)=O)CC4)C=C3)=O)C2(C)C)=CC=C1C#N	62	>95	>99
18	ClC1=CC(O[C@H]2C(C)(C)[C@H](NC(C3=CC=C(C#CC4CCN(C(C[C@H](NC([C@@H]5C[C@@H](O)CN5C([C@H](C(C)C)C6=CC(C)=NO6)=O)=O)C7=CC=C(Cl)C=C7)=O)CC4)C=C3)=O)C2(C)C)=CC=C1C#N	85	>95	>99
19	ClC1=CC(O[C@H]2C(C)(C)[C@H](NC(C3=CC=C(C#CC4CCN(C(C[C@H](NC([C@@H]5C[C@@H](O)CN5C([C@@H](C6=CC(C)=NO6)C(C)C)=O)=O)C7=CC=C(Br)C=C7)=O)CC4)C=C3)=O)C2(C)C)=CC=C1C#N	31	>95	>99
20	ClC1=CC(O[C@H]2C(C)(C)[C@H](NC(C3=CC=C(C#CC4CCN(C(C[C@H](NC([C@@H]5C[C@@H](O)CN5C([C@@H](C6=CC(C)=NO6)C(C)C)=O)=O)C7=CC=C(C#N)C=C7)=O)CC4)C=C3)=O)C2(C)C)=CC=C1C#N	80	>95	>99
21	ClC1=CC(O[C@H]2C(C)(C)[C@H](NC(C3=CC=C(C#CC4CCN(C(C[C@H](NC([C@@H]5C[C@@H](O)CN5C([C@H](C(C)C)C6=CC(C)=NO6)=O)=O)C7=CC=C(C#C)C=C7)=O)CC4)C=C3)=O)C2(C)C)=CC=C1C#N	76	>95	>99
22	ClC1=CC(O[C@H]2C(C)(C)[C@H](NC(C3=CC=C(C#CC4CCN(C(C[C@H](NC([C@@H]5C[C@@H](O)CN5C([C@H](C(C)C)NC(C)=O)=O)=O)C6=CC=CC=C6)=O)CC4)C=C3)=O)C2(C)C)=CC=C1C#N	<5	<5	<5
		IC50 ± SD (µM)	Ki ± SD (µM)
VHL-a	CNC(C[C@H](NC([C@@H]1C[C@@H](O)CN1C([C@H](C(C)C)C2=CC(C)=NO2)=O)=O)C3=CC=C(C4=C(C)N=CS4)C=C3)=O	0.025± 0.0040.006 ± 0.001	0.006 ± 0.001
VHL-b	CNC(C[C@H](NC([C@@H]1C[C@@H](O)CN1C([C@H](C(C)C)C2=CC(C)=NO2)=O)=O)C3=CC=C(C#C)C=C3)=O	0.21 ± 0.04	0.058 ± 0.011
VHL-c	CNC(C[C@H](NC([C@@H]1C[C@@H](O)CN1C([C@@H](C2=CC(C)=NO2)C(C)C)=O)=O)C3=CC=C(C#N)C=C3)=O	1.08 ± 0.07	0.31 ± 0.02
VHL-d	CNC(C[C@H](NC([C@@H]1C[C@@H](O)CN1C([C@@H](C2=CC(C)=NO2)C(C)C)=O)=O)C3=CC=C(Br)C=C3)=O	0.98 ± 0.15	0.28 ± 0.04
VHL-e	CNC(C[C@H](NC([C@@H]1C[C@@H](O)CN1C([C@H](C(C)C)C2=CC(C)=NO2)=O)=O)C3=CC=C(Cl)C=C3)=O	2.52 ± 0.3	0.72 ± 0.09
VHL-f	CNC(C[C@H](NC([C@@H]1C[C@@H](O)CN1C([C@H](C(C)C)C2=CC(C)=NO2)=O)=O)C3=CC=C(F)C=C3)=O	10.5 ± 1.6	3.0 ± 0.5
VHL-g	CNC(C[C@H](NC([C@@H]1C[C@@H](O)CN1C([C@H](C(C)C)C2=CC(C)=NO2)=O)=O)C3=CC=CC=C3)=O	9.9 ± 0.5	2.8 ± 0.2
VHL-h	CNC(C[C@H](NC([C@@H]1C[C@@H](O)CN1C([C@H](C(C)C)NC(C)=O)=O)=O)C2=CC=CC=C2)=O	>100	--
41	ClC1=CC(O[C@H]2C(C)(C)[C@H](NC(C3=CN(CCO)N=C3)=O)C2(C)C)=CC=C1C#N
